# Supplementary material
Source: Springer Nature journal article supplement (https://www.springermedizin.de/resource/supplementary/12879_2011_1739_MOESM1_ESM.pdf/9443924)
Supplement: MOESM1 [file 9443924]

Parasite prevalence Valley

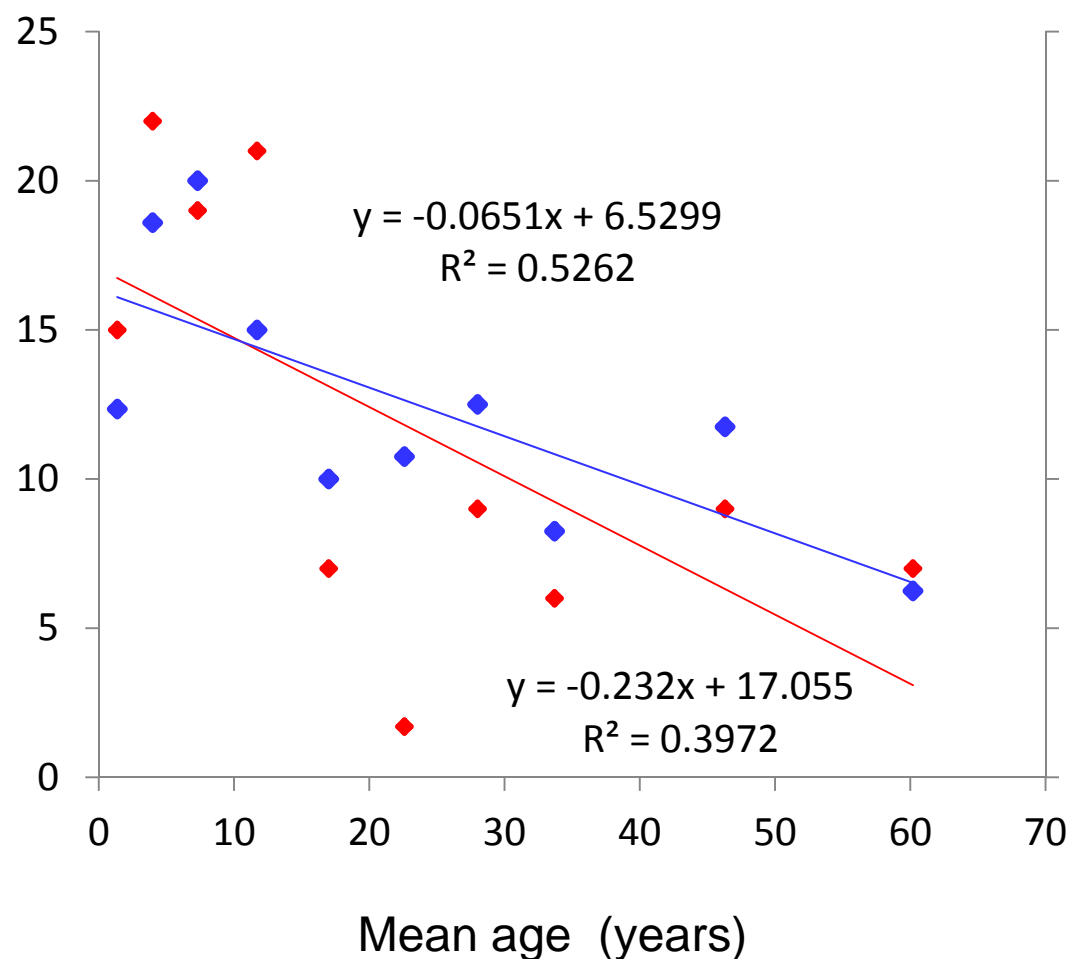

- ◆ Valley Parasite
- ◆ Uphill parasite
- Linear (Valley Parasite)
- Linear (Uphill parasite)
